# Supplementary material
Source: publisher site journal article supplement (https://www.dovepress.com/article/323379)

**Supplementary figure 1. The heat map of the hub proteins of the turquoise module in the ICM, DCM, and control group.**

**Supplementary figure 2. The heat map of the hub proteins of the black and green modules in the ICM, DCM, and control group.**

# Hub proteins in turquoise module

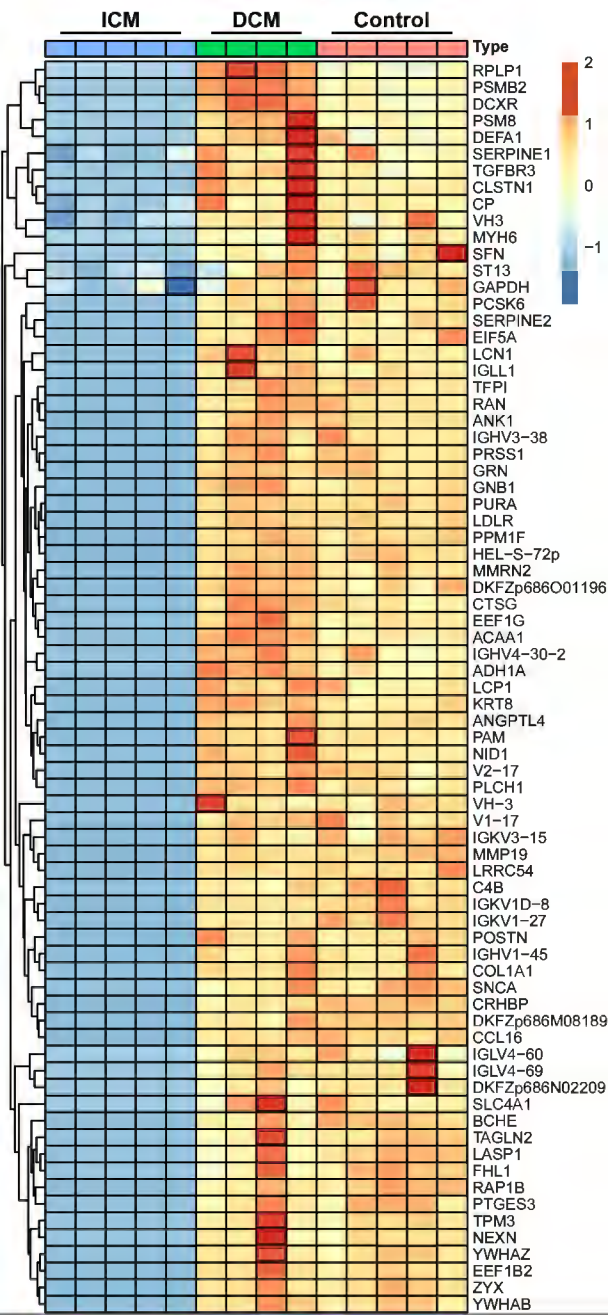

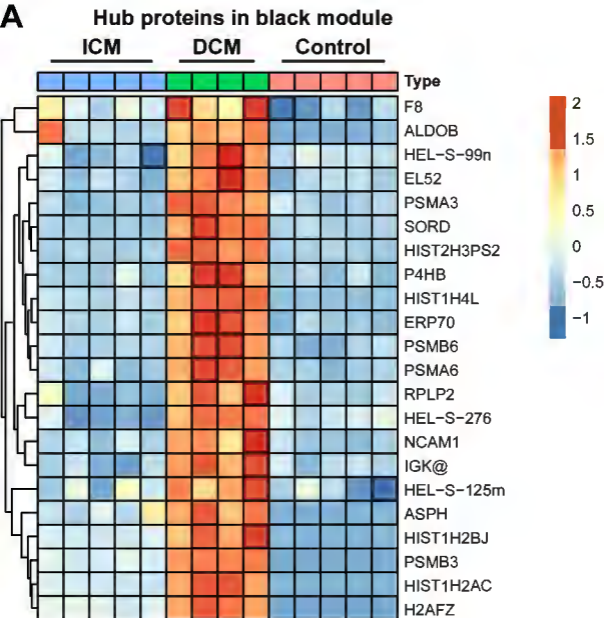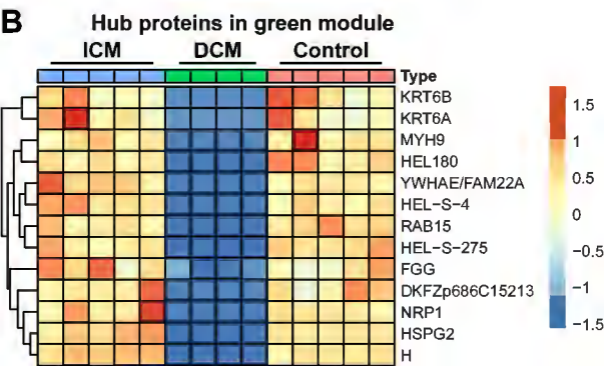

Supplement: Supplementary file 1 [file get_supplementary_file.php]
